# Supplementary material for: Airborne measurements of fire Emission Factors for African biomass burning sampled during the MOYA Campaign
Source: Copernicus journal article supplement (doi:10.5194/acp-2020-558), 2020-07-10
Supplement: Supplementary file 1 [file acp-2020-558-supplement.pdf]

## Supplementary material

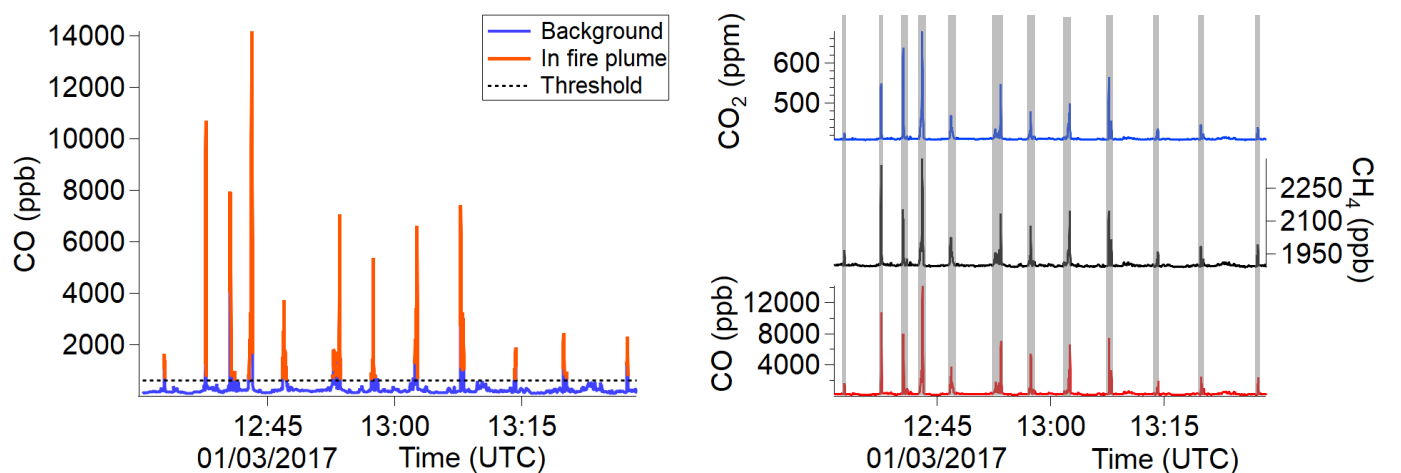

**Figure S1: (Left)** CO mixing ratio time series over the course of flight C005, with the plumes exceeding the statistical threshold shown in orange and the background shown in purple. The plume selection threshold is also shown as a dashed line. **(Right)** time series of CO (red), CH<sub>4</sub> (black) and CO<sub>2</sub> (blue) concentrations over flight C005, the biomass burning plumes chosen for analysis are highlighted in grey.

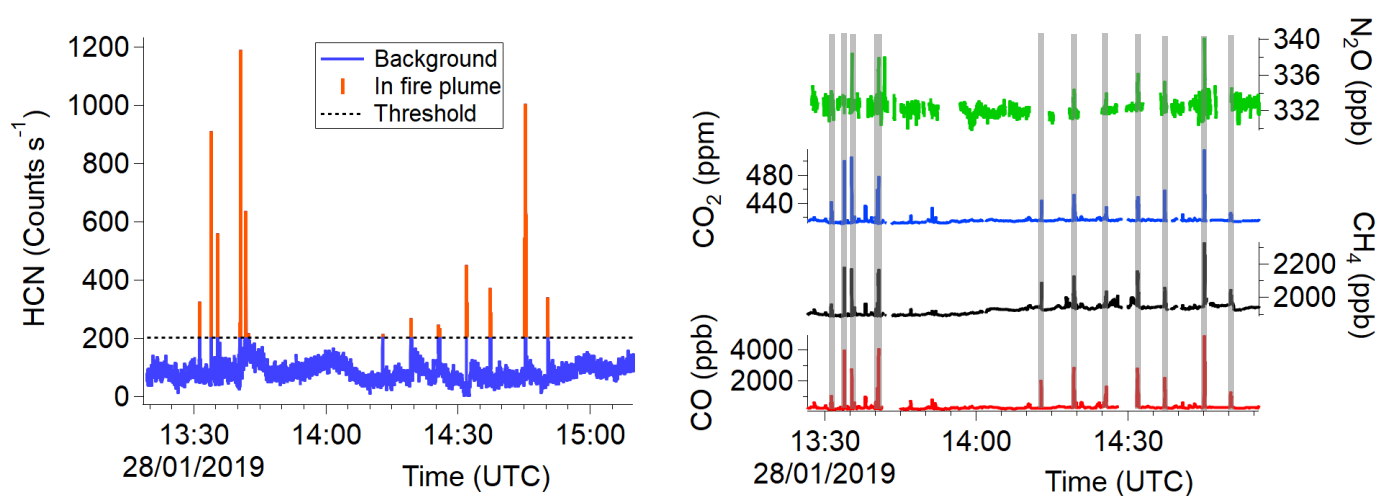

**Figure S2: (Left)** ToF-CIMS HCN measurement frequency time series over the course of flight C133, with the plumes exceeding the statistical threshold shown in orange and the background shown in purple. The plume selection threshold is also shown as a dashed line. **(Right)** time series of CO (red), CH<sub>4</sub> (black), CO<sub>2</sub> (blue) and N<sub>2</sub>O (green) concentrations over flight C133, the biomass burning plumes chosen for analysis are highlighted in grey.

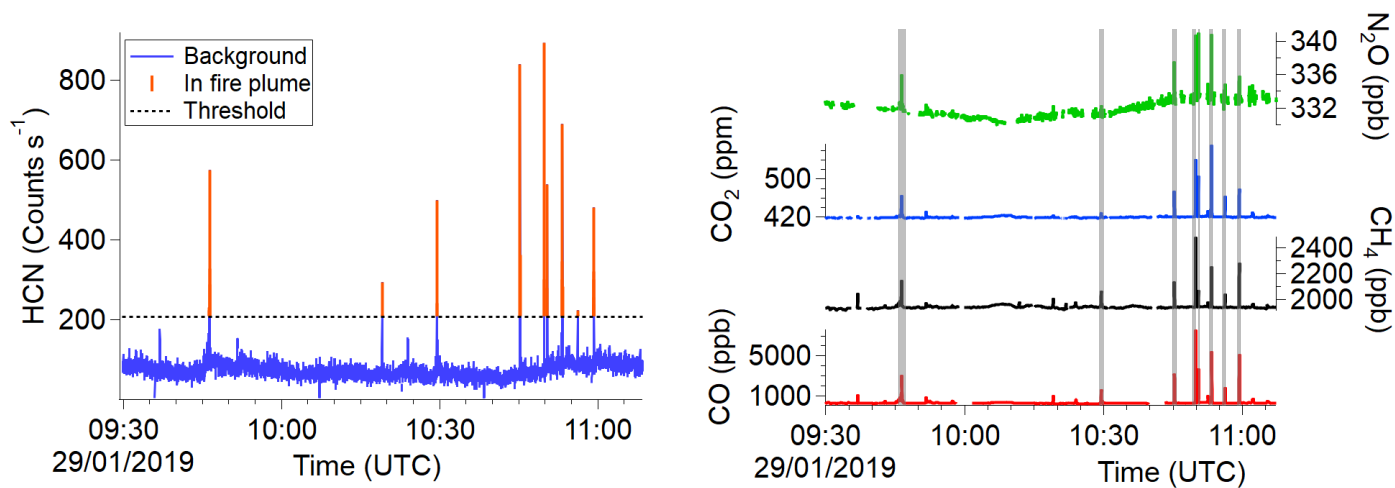

**Figure S3: (Left) ToF-CIMS HCN measurement frequency time series over the course of flight C134, with the plumes exceeding the statistical threshold shown in orange and the background shown in purple. The plume selection threshold is also shown as a dashed line. (Right) time series of CO (red), CH<sub>4</sub> (black), CO<sub>2</sub> (blue) and N<sub>2</sub>O (green) concentrations over flight C134, the biomass burning plumes chosen for analysis are highlighted in grey.**
